# Supplementary material
Source: ML conference proceedings conference paper supplement (https://proceedings.mlr.press/v38/sun15.html)
Supplement: Supplementary file 1 [file sun15-supp.pdf]

# Inferring Block Structure of Graphical Models in Exponential Families (Supplementary Material)

Siqi Sun, Hai Wang and Jinbo Xu

January 23, 2015

## 1 Detailed calculation of Proposition 2

It is not difficult to infer the form variational distribution for  $\Theta$  based on its complete conditionals, where  $q(\beta|\lambda)$  is Beta distribution,  $q(\pi|\gamma)$  is Dirichlet distribution, and  $q(z|\phi)$  is categorical distribution. More specifically,

$$\begin{aligned}
 E_q[\log p(\beta_k|\eta_k)] &= E_q[(\eta - 1) \log \beta_k] + E_q[(\eta - 1) \log(1 - \beta_k)] - C \\
 &= (\eta - 1)(\psi(\lambda_{k1}) + \psi(\lambda_{k2}) - \psi(\lambda_{k1} + \lambda_{k2})) \\
 E_q[\log q(\beta_k|\lambda_k)] &= (\lambda_{k1} - 1)E_q[\log \beta_k] + (\lambda_{k2} - 1)E_q[\log(1 - \beta_k)] - C \\
 &= (\lambda_{k1} - 1)\psi(\lambda_{k1}) + (\lambda_{k2} - 1)\psi(\lambda_{k2}) - (\lambda_{k1} + \lambda_{k2} - 2)\psi(\lambda_{k1} + \lambda_{k2}) \\
 E_q[\log p(\pi_a|\alpha)] &= \alpha E_q[\sum_k \log \pi_{ak}] = \alpha \sum_k \psi(\gamma_{ak}) - \psi(\gamma_a) \\
 E_q[\log q(\pi_a|\gamma_a)] &= E_q[\sum_k \gamma_{ak} \log \pi_{ak}] = \sum_k \gamma_{ak}(\psi(\gamma_{ak}) - \psi(\gamma_a)) \\
 E_q[\log p(z_{a \rightarrow b}|\pi_a)] &= E_q[\sum_k z_{a \rightarrow b}^k \log \pi_{ak}] = \sum_k E_q[z_{a \rightarrow b}^k] E_q[\log \pi_{ak}] = \sum_k \phi_{a \rightarrow b}^k (\psi(\gamma_{ak}) - \psi(\gamma_a)) \\
 E_q[\log p(z_{a \leftarrow b}|\pi_b)] &= E_q[\sum_k z_{a \leftarrow b}^k \log \pi_{bk}] = \sum_k E_q[z_{a \leftarrow b}^k] E_q[\log \pi_{bk}] = \sum_k \phi_{a \leftarrow b}^k (\psi(\gamma_{bk}) - \psi(\gamma_b)) \\
 E_q[\log q(z_{a \rightarrow b}|\phi_{a \rightarrow b})] &= E_q[\sum_k z_{a \rightarrow b}^k \log \phi_{a \rightarrow b}^k] = \sum_k \phi_{a \rightarrow b}^k \log \phi_{a \rightarrow b}^k \\
 E_q[\log q(z_{a \leftarrow b}|\phi_{a \leftarrow b})] &= E_q[\sum_k z_{a \leftarrow b}^k \log \phi_{a \leftarrow b}^k] = \sum_k \phi_{a \leftarrow b}^k \log \phi_{a \leftarrow b}^k \\
 E_q[\log p(\bar{y}_{ab}|z_{a \rightarrow b}, z_{a \leftarrow b}, \beta)] &= E_q[\bar{w}_{ab} \log r_{ab} + (1 - \bar{w}_{ab}) \log(1 - r_{ab})] \\
 &= \bar{w}_{ab} \sum_k \phi_{a \rightarrow b}^k \phi_{a \leftarrow b}^k (\psi(\lambda_{k1}) - \psi(\lambda_k)) + (1 - \sum_k \phi_{a \rightarrow b}^k \phi_{a \leftarrow b}^k) \log \epsilon \\
 &\quad + (1 - \bar{w}_{ab}) (\sum_k \phi_{a \rightarrow b}^k \phi_{a \leftarrow b}^k (\psi(\lambda_{k2}) - \psi(\lambda_k)) + (1 - \sum_k \phi_{a \rightarrow b}^k \phi_{a \leftarrow b}^k) \log(1 - \epsilon))
 \end{aligned}$$

Therefore the ELBO can be calculated accordingly.

## 2 Proposition 1

$$\begin{aligned}
 P(X, w, \Theta) &= P(X|w)P(w|\Theta)P(\Theta) \\
 &= \left( \prod_a P(X_a|X_{-a}, w) \right) \left( \prod_{a,b} P(w_{ab}|\Theta) \right) P(\beta|\eta)P(z|\pi)P(\pi|\alpha) \quad (1)
 \end{aligned}$$

(2)

And it is easy to see that

$$\begin{aligned}
 P(X|w) &= \prod_{i=1}^n \exp\left(\sum_{a=1}^p \sum_{b=1}^p w_{ab} X_a^i X_b^i + C(X_a) - D(X_{-a})\right) \\
 P(w|\Theta) &= \prod_{a,b} \frac{1}{2\rho_{ab}(r_{ab})} \exp\left(-\frac{|w_{ab}|}{\rho_{ab}(r_{ab})}\right) \\
 P(\Theta) &= \prod_k \frac{1}{B(\eta_{k1}, \eta_{k2})} \beta_{k1}^{\eta_{k1}-1} (1 - \beta_{k1})^{\eta_{k2}-1} \\
 &\quad \prod_{a \leq b} \prod_k \pi_{a,k}^{z_{a \rightarrow b}^k} \pi_{b,k}^{z_{a \leftarrow b}^k} \prod_a \frac{1}{B(\alpha)} \prod_k \pi_{a,k}^{\alpha_k - 1}, \quad (3)
 \end{aligned}$$
